# Supplementary material
Source: PubMed Central journal article supplement (PMC6030698)

## Expanded View Figures

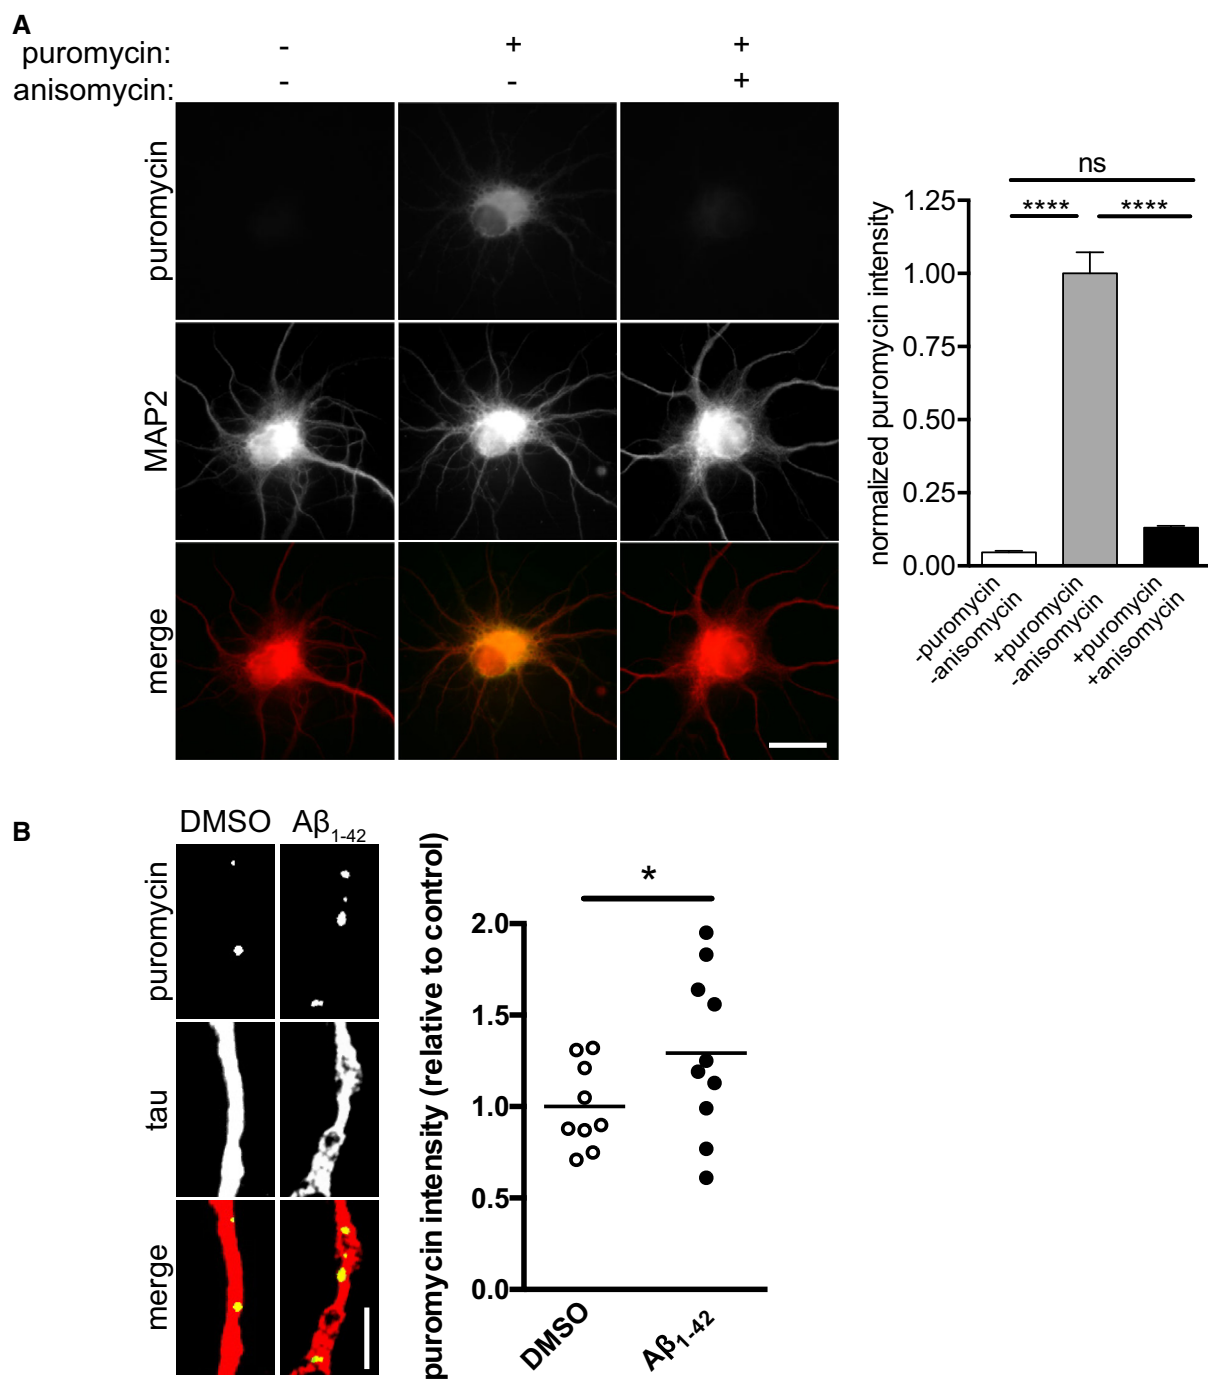

**Figure EV1. Validation of puromylation assay.**

A Hippocampal neurons were cultured for 10–11 DIV. Puromycin was added to dissociated hippocampal neurons in the presence of vehicle or anisomycin. The neurons were fixed and immunostained for puromycin and MAP2. Mean  $\pm$  SEM of 25–30 optical fields per condition ( $n = 3$  independently performed experiments per group). \*\*\*\* $P < 0.0001$ ; ns, not significant; one-way ANOVA with Bonferroni's multiple comparisons test. Scale bar, 10  $\mu$ m.

B Hippocampal neurons were cultured for 10–11 DIV. A $\beta_{1-42}$  was added to the cultured for 30 min, and puromycin was added 10 min prior to fixation. Neurons were fixed and immunostained for puromycin and tau. Mean of 9–10 optical fields per condition (sampled from two coverslips per condition) from one primary culture. \* $P < 0.05$ ; unpaired, one-tailed t-test. Scale bar, 5  $\mu$ m.

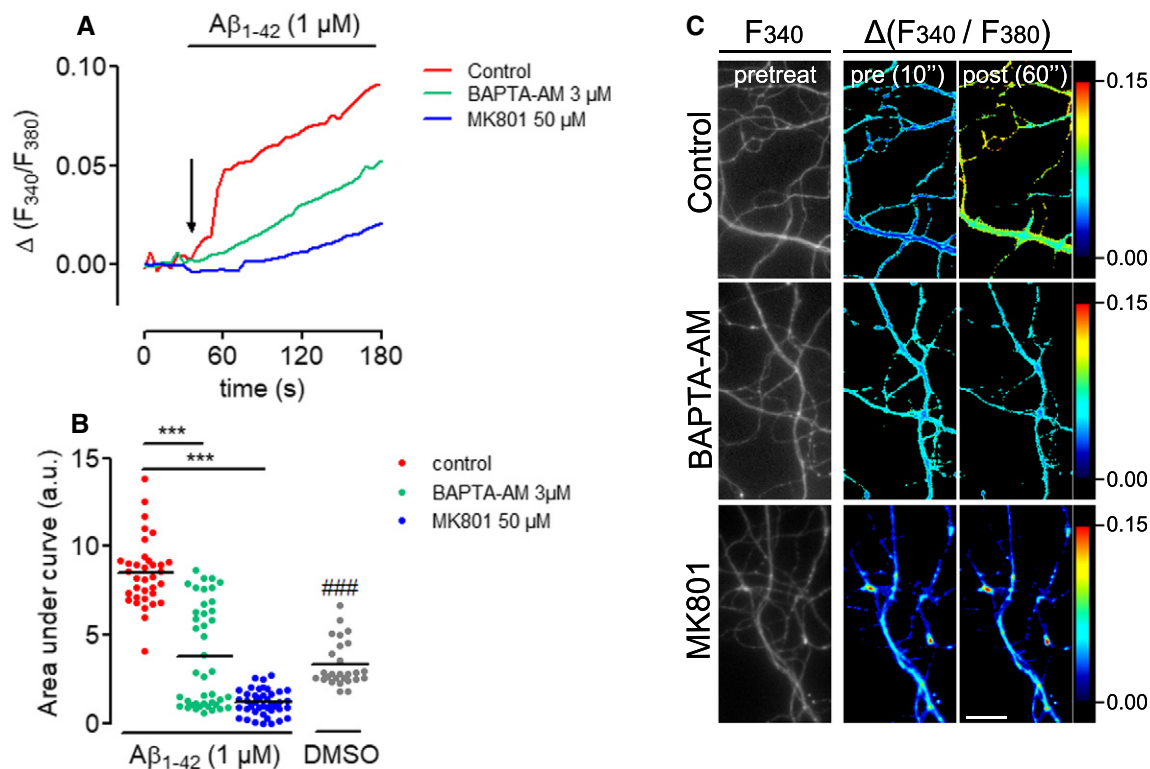

**Figure EV2.**  $A\beta_{1-42}$  oligomers increase  $\text{Ca}^{2+}$  levels in distal neurites in an NMDA-dependent manner.

- A Hippocampal neurons were grown at low density ( $5,000 \text{ cells cm}^{-2}$ ) for  $> 10$  DIV and loaded with Fura2-AM.  $\text{Ca}^{2+}$  levels were measured before and during perfusion with  $A\beta_{1-42}$  oligomers in the presence or absence of the NMDA receptor antagonist MK801 and the  $\text{Ca}^{2+}$ -chelator BAPTA-AM. Relative changes in Fura2-AM fluorescence intensity were plotted as means of 35–42 neurites imaged in two independent experiments.
- B Cumulative  $\text{Ca}^{2+}$  levels represented by the area under the curves in (A). Mean of 27–42 neurites imaged in two independent experiments.  $***P < 0.001$ ; one-way ANOVA with Bonferroni's multiple comparisons test.  $###P < 0.001$ ,  $t$ -test control  $A\beta_{1-42}$  vs. DMSO.
- C Micrographs of representative axonal segments quantified in (A and B). Fura2-AM levels before (two most left panels, grayscale and pseudocolor image) and after (right panel, pseudocolor image)  $A\beta_{1-42}$  perfusion at the indicated experimental conditions are shown. Scale bar, 25  $\mu\text{m}$ .

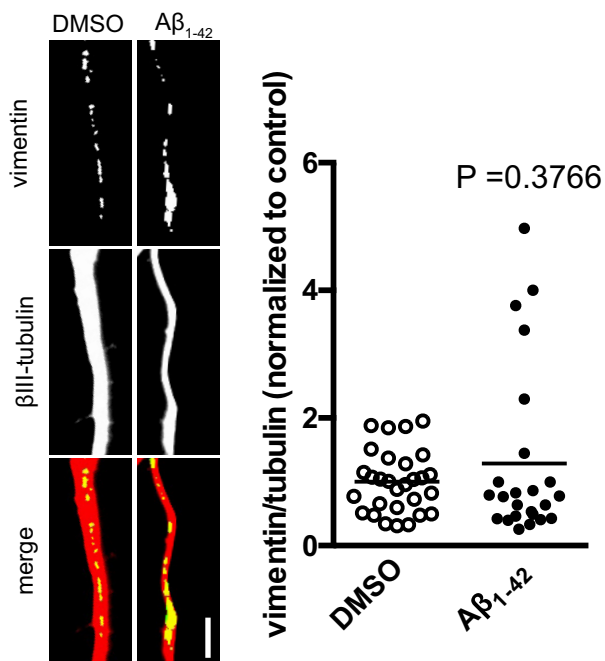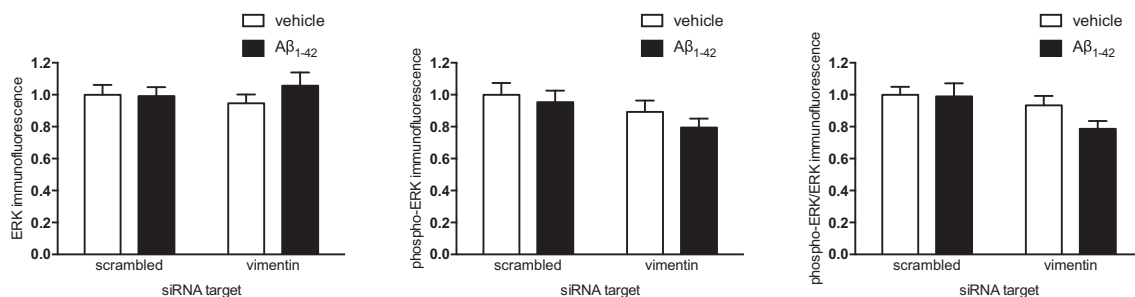

Supplement: EMBR-19-e45435-s001.pdf [file EMBR-19-e45435-s001.pdf]
